# Supplementary material for: Bifunctional P-Containing RuO2 Catalysts Prepared from Surplus Ru Co-Ordination Complexes and Applied to Zn/Air Batteries
Source: MDPI journal article supplement (doi:10.3390/nano13010115), 2022-12-26
Supplement: s1 [file s1]

# Bifunctional P-containing RuO<sub>2</sub> Catalysts Prepared from Surplus Ru Co-ordination Complexes and Applied to Zn/Air Batteries

Sebastián Lorca <sup>1</sup>, Javier Torres <sup>1</sup>, José L. Serrano <sup>2</sup>, José Pérez <sup>2</sup>, José Abad <sup>1</sup>, Florencio Santos <sup>1</sup> and Antonio J. Fernández Romero <sup>1\*</sup>

<sup>1</sup> Grupo de Materiales Avanzados para la Producción y Almacenamiento de Energía, Universidad Politécnica de Cartagena, Aulario II, Campus de Alfonso XIII, 30203 Cartagena, Spain; sebastian.lorca@edu.upct.es (S.L.); javiertorresuniv@gmail.com (J.T.); jose.abad@upct.es (J.A.); florencio.santos@upct.es (F.S.)

<sup>2</sup> Departamento de Ingeniería Química, Área de Química Inorgánica. Universidad Politécnica de Cartagena. Plaza del Hospital 1, 30203 Cartagena, Spain; jose.serrano@upct.es (J.L.S.); jose.pperez@upct.es (J.P.)

\* Correspondence: antonioj.fernandez@upct.es

## 1. Structural characterization

### 1.1. EDX and SEM Measurements

**Table S1.** Ru and P ratios for [RuCl<sub>2</sub>-(PPH<sub>3</sub>)<sub>3</sub>] obtained at different temperatures.

| Sample<br>[RuO <sub>2</sub> [PPh <sub>3</sub> ] | Ru (%m norm.) | P (%m norm.) | P/Ru |
|-------------------------------------------------|---------------|--------------|------|
| 500 °C                                          | 35.10         | 16.58        | 0.47 |
| 700 °C                                          | 41.23         | 15.73        | 0.38 |
| 900 °C                                          | 57.64         | 1.61         | 0.03 |

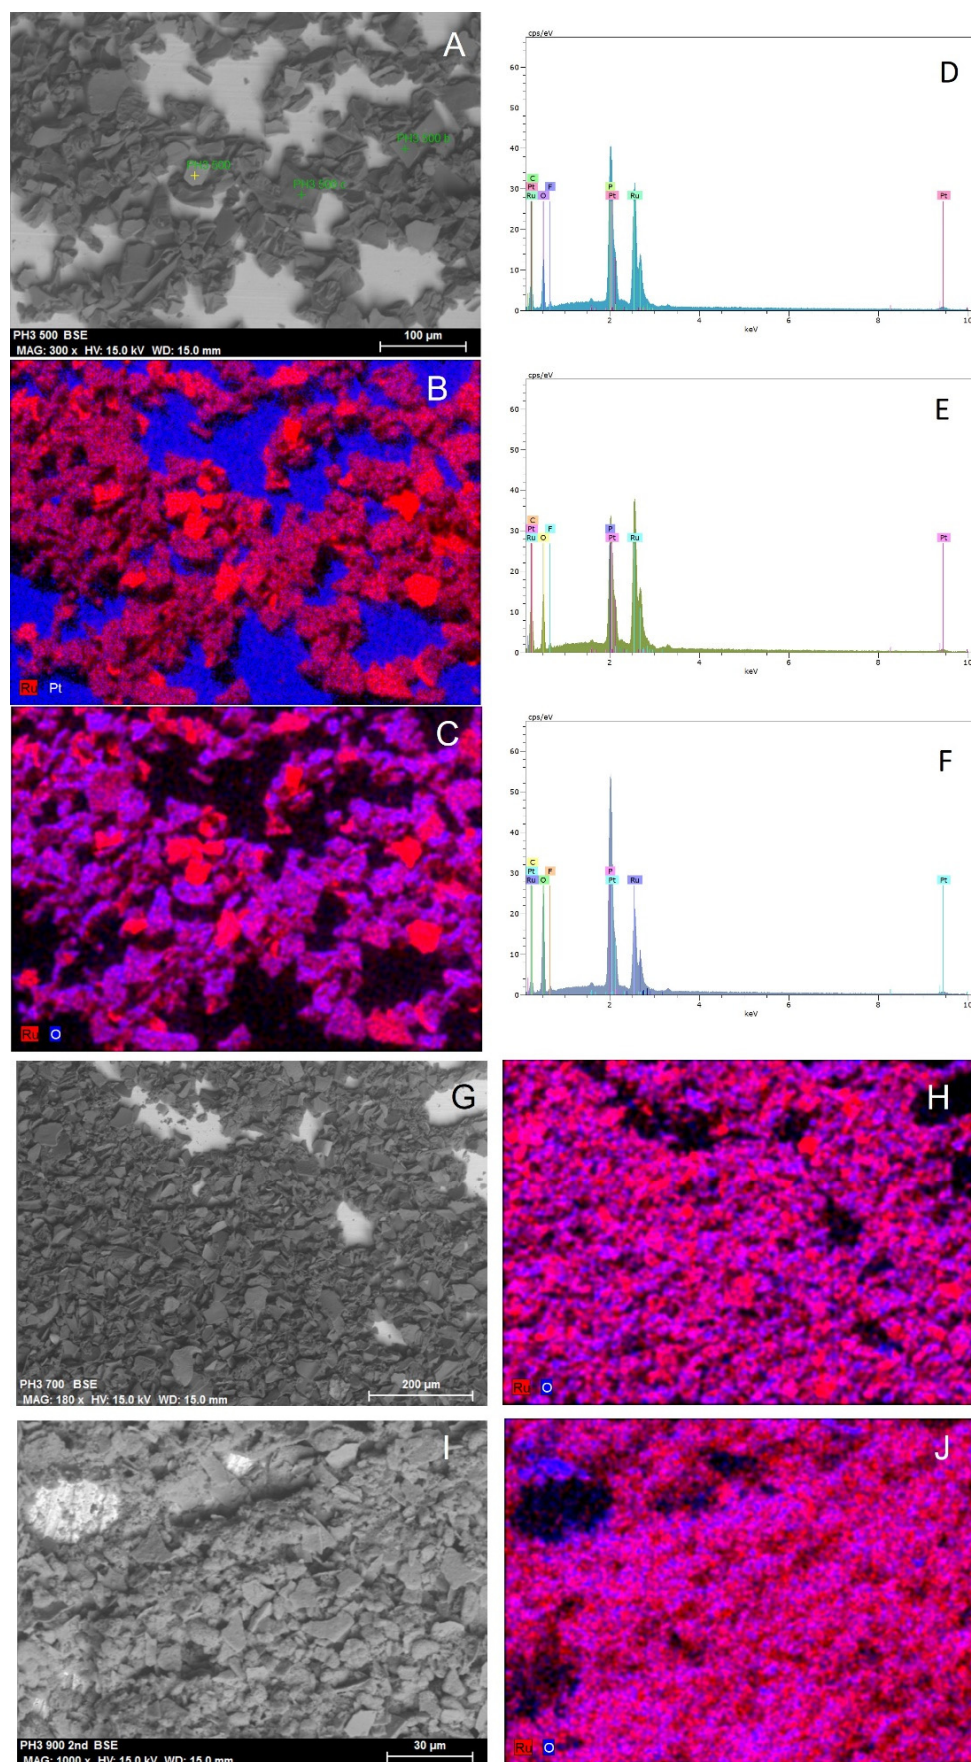

**Figure S1.** SEM images of  $\text{RuO}_2 [\text{PPh}_3]$  obtained at 500 °C (A), 700 °C (G) and 900 °C (I). EDX map-  
ping of  $\text{RuO}_2 [\text{PPh}_3]$  500 ((B): Ru, Pt and (C): Ru, O), 700 (H) and 900 (J). (D-F) EDX for the marked  
points on (A).

## 1.2. TGA

20

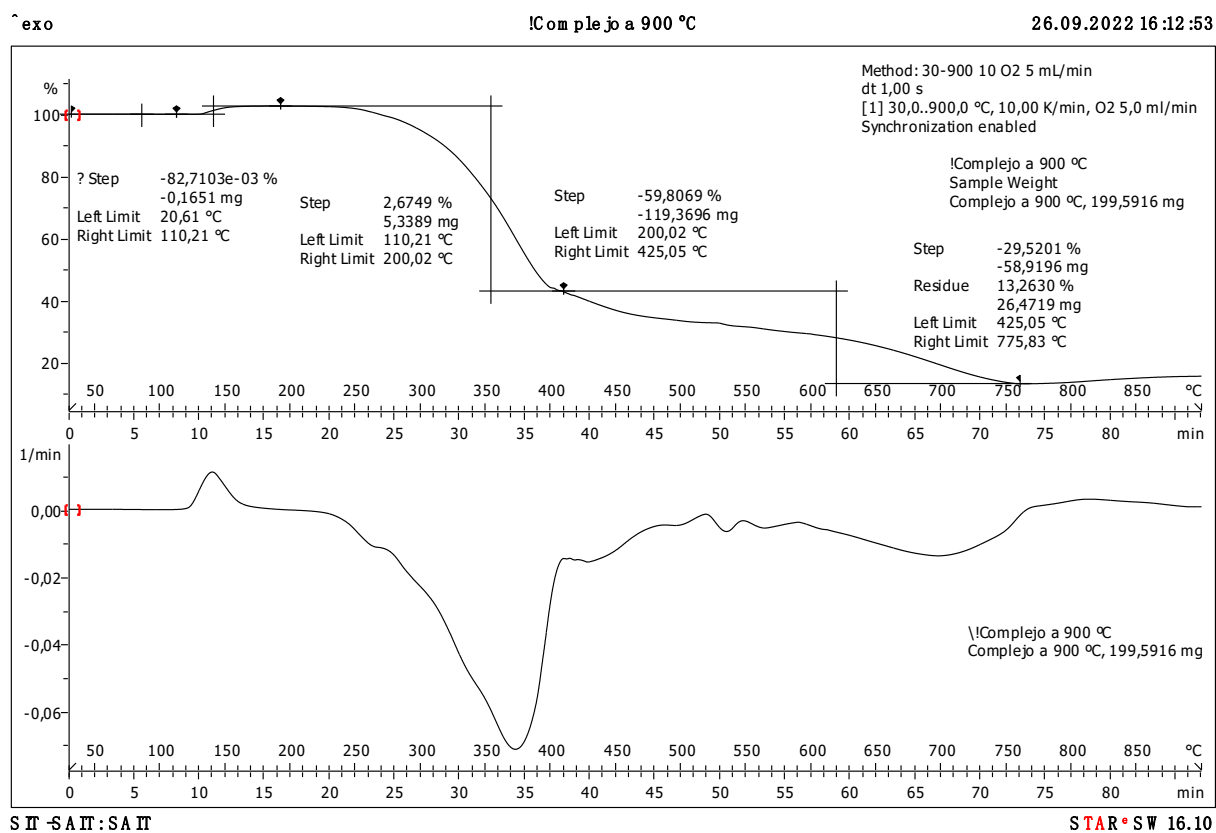

Figure S2. TG and DTG curves registered for  $[\text{RuCl}_2\text{-(PPh}_3)_3]$ .

21

22

23

24

25

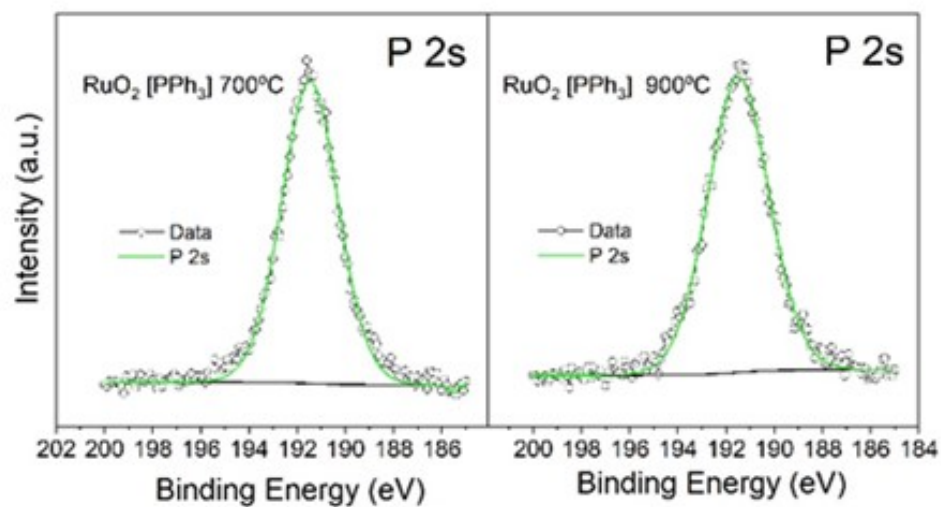

Figure S3. XPS of the P2s region.

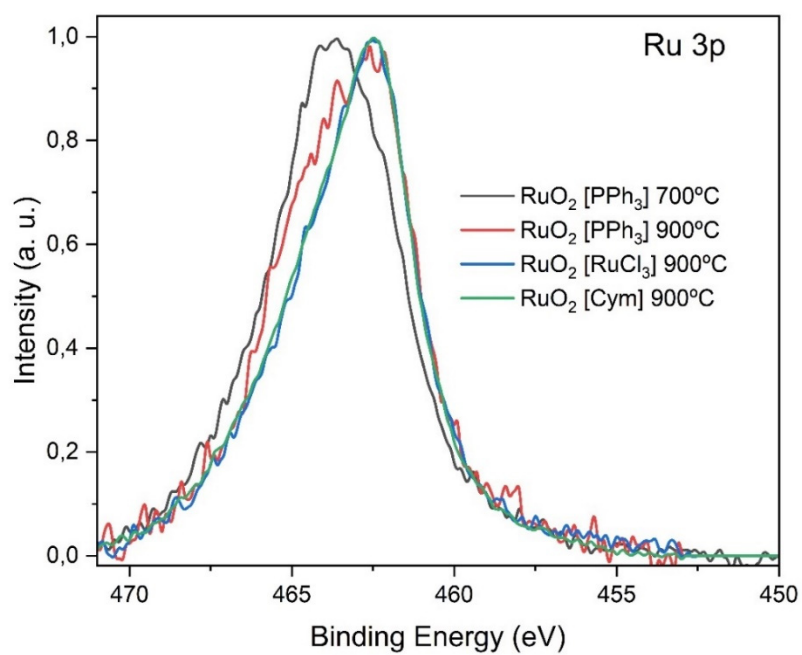

Figure S4. XPS of the Ru3p region.

**Table S2.** Fitting parameters of the XPS peaks deconvolutions.

| Sample                          | Peak                 | Assigned                        | BE (eV) | FWHM (eV) | Area | Lineshape     |
|---------------------------------|----------------------|---------------------------------|---------|-----------|------|---------------|
| RuO <sub>2</sub> [PPH3] 700 °C  | Ru 3d <sub>5/2</sub> | Ru (IV)                         | 280.9   | 0.5       | 1438 | Asymmetric GL |
|                                 | Ru 3d <sub>5/2</sub> | Satellite                       | 282.5   | 0.8       | 719  | Asymmetric GL |
|                                 | Ru 3d <sub>5/2</sub> | Ru (III)                        | 282.8   | 1.9       | 2841 | Asymmetric GL |
|                                 | C 1s                 |                                 | 284.8   | 1.7       | 944  | G(70)L(30)    |
|                                 | Ru 3d <sub>3/2</sub> | Ru (IV)                         | 285.1   | 1.1       | 963  | Asymmetric GL |
|                                 | Ru 3d <sub>3/2</sub> | Satellite                       | 286.7   | 1.4       | 482  | Asymmetric GL |
|                                 | Ru 3d <sub>3/2</sub> | Ru (III)                        | 287.0   | 2.1       | 1903 | Asymmetric GL |
| RuO <sub>2</sub> [PPH3] 900 °C  | Ru 3d <sub>5/2</sub> | Ru (0)                          | 280.2   | 0.4       | 167  | Asymmetric GL |
|                                 | Ru 3d <sub>5/2</sub> | Ru (IV)                         | 280.8   | 0.6       | 1354 | Asymmetric GL |
|                                 | Ru 3d <sub>5/2</sub> | Satellite                       | 282.2   | 1.3       | 677  | Asymmetric GL |
|                                 | Ru 3d <sub>5/2</sub> | Ru (III)                        | 283.3   | 1.5       | 731  | Asymmetric GL |
|                                 | Ru 3d <sub>5/2</sub> | Ru (0)                          | 284.5   | 0.4       | 112  | Asymmetric GL |
|                                 | C 1s                 |                                 | 284.7   | 1.8       | 763  | G(70)L(30)    |
|                                 | Ru 3d <sub>3/2</sub> | Ru (IV)                         | 285.0   | 1.0       | 907  | Asymmetric GL |
|                                 | Ru 3d <sub>3/2</sub> | Satellite                       | 286.4   | 1.3       | 454  | Asymmetric GL |
|                                 | Ru 3d <sub>3/2</sub> | Ru (III)                        | 287.5   | 1.7       | 490  | Asymmetric GL |
|                                 | Ru 3d <sub>5/2</sub> | Ru (IV)                         | 280.2   | 0.5       | 5739 | Asymmetric GL |
| RuO <sub>2</sub> [RuCl3] 900 °C | Ru 3d <sub>5/2</sub> | Satellite                       | 282.7   | 1.4       | 2851 | Asymmetric GL |
|                                 | C 1s                 |                                 | 284.7   | 1.6       | 1429 | G(70)L(30)    |
|                                 | Ru 3d <sub>3/2</sub> | Ru (IV)                         | 285.0   | 1.0       | 3845 | Asymmetric GL |
|                                 | Ru 3d <sub>3/2</sub> | Satellite                       | 286.9   | 1.6       | 1910 | Asymmetric GL |
|                                 | Ru 3d <sub>5/2</sub> | Ru (IV)                         | 280.8   | 0.5       | 5598 | Asymmetric GL |
| RuO <sub>2</sub> [Cym] 900 °C   | Ru 3d <sub>5/2</sub> | Satellite                       | 282.7   | 1.3       | 2645 | Asymmetric GL |
|                                 | C 1s                 |                                 | 284.7   | 2.4       | 1447 | G(70)L(30)    |
|                                 | Ru 3d <sub>3/2</sub> | Ru (IV)                         | 285.0   | 1.0       | 3751 | Asymmetric GL |
|                                 | Ru 3d <sub>3/2</sub> | Satellite                       | 286.8   | 1.6       | 1772 | Asymmetric GL |
|                                 | Ru 3d <sub>5/2</sub> | Ru (IV)                         | 280.8   | 0.5       | 5598 | Asymmetric GL |
| RuO <sub>2</sub> [PPH3] 700 °C  | O 1s                 | Ru-O                            | 529.6   | 0.8       | 334  | Asymmetric GL |
|                                 | O 1s                 | P-O-P                           | 531.3   | 1.5       | 1809 | G(70)L(30)    |
|                                 | O 1s                 | Satellite                       | 531.5   | 1.9       | 161  | Asymmetric GL |
|                                 | O 1s                 | Ru-O-P                          | 533.0   | 1.8       | 1551 | G(70)L(30)    |
| RuO <sub>2</sub> [PPH3] 900 °C  | O 1s                 | Ru-O                            | 529.4   | 0.7       | 234  | Asymmetric GL |
|                                 | O 1s                 | P-O-P                           | 531.2   | 1.6       | 1090 | G(70)L(30)    |
|                                 | O 1s                 | Satellite                       | 531.3   | 1.7       | 112  | Asymmetric GL |
|                                 | O 1s                 | Ru-O-P                          | 532.6   | 2.0       | 1973 | G(70)L(30)    |
|                                 | O 1s                 | O2/H2O                          | 535.8   | 1.9       | 97   | G(70)L(30)    |
| RuO <sub>2</sub> [RuCl3] 900 °C | O 1s                 | Ru-O                            | 529.4   | 0.7       | 1008 | Asymmetric GL |
|                                 | O 1s                 | screening                       | 530.3   | 1.4       | 680  | G(70)L(30)    |
|                                 | O 1s                 | Satellite                       | 531.3   | 1.6       | 484  | Asymmetric GL |
|                                 | O 1s                 | C-O                             | 532.4   | 2.0       | 387  | G(70)L(30)    |
| RuO <sub>2</sub> [Cym] 900 °C   | O 1s                 | Ru-O                            | 529.4   | 0.7       | 981  | Asymmetric GL |
|                                 | O 1s                 | screening                       | 530.3   | 1.4       | 654  | G(70)L(30)    |
|                                 | O 1s                 | Satellite                       | 531.2   | 1.7       | 471  | Asymmetric GL |
|                                 | O 1s                 | C-O                             | 532.5   | 2.1       | 406  | G(70)L(30)    |
| RuO <sub>2</sub> [PPH3] 700 °C  | P 2s                 | (PO <sub>3</sub> ) <sup>-</sup> | 191.5   | 2.7       | 923  | G(70)L(30)    |
| RuO <sub>2</sub> [PPH3] 900 °C  | P 2s                 | (PO <sub>3</sub> ) <sup>-</sup> | 191.5   | 3.0       | 736  | G(70)L(30)    |

:

## 2. Electrochemical Characterization

The electro-chemical performance tests were conducted by using a Biologic VSP Modular 5 channels potentiostat/galvanostat electrochemical workstation coupled with a rotating disk-ring electrode system RRDE-3A (Als Co.Ltd.) consisting of a (glassy carbon) GC disk-Pt-ring as working electrode. Besides, a reference electrode of Hg/HgO and a GC bar were used in a three electrode cell.

Voltage values have been converted to a reversible hydrogen electrode (RHE) scale according to the equation:

$$E_{RHE} = E_{Hg/HgO} + 0.059 \times pH + 0.098 \quad (S1)$$

The electrochemical and hydrodynamic properties of electrocatalyst are evaluated using the Koutecky-Levich expression:

$$\frac{1}{I_D} = \frac{1}{I_K} + \frac{1}{I_L} = \frac{1}{I_K} + \frac{1}{0.62nFAc_{O_2}^*D_0^{\frac{2}{3}}v^{-\frac{1}{6}}\omega^{\frac{1}{2}}} \quad (S2)$$

where n is the electron transfer number, F is the Faraday constant,  $D_{O_2} = 1.93 \times 10^{-5} \text{ cm}^2 \text{ s}^{-1}$  is the diffusion coefficient of  $O_2$  in the electrolyte,  $v = 1.09 \times 10^{-2} \text{ cm}^2 \text{ s}^{-1}$  is the kinematic viscosity, and  $c_{O_2}^* = 0.126 \times 10^{-6} \text{ mol cm}^{-3}$  is the bulk concentration of  $O_2$  in the electrolyte using pure  $O_2$ .

Besides, due to the controversy on use KL method, the electron transfer number and the percentage ratio of  $HO_2^-$  on the electrode potential was tested by the RRDE method based on Equations (S3) and (S4) [1]

$$n = \frac{4I_d}{I_d + \left(\frac{I_r}{N}\right)} \quad (S3)$$

$$H_2O_2 (\%) = 200 \frac{I_r/N}{I_d + \left(\frac{I_r}{N}\right)} \quad (S4)$$

where  $I_d$  is the disk current,  $I_r$  is the ring current, and N is the geometric factor of the RRDE known more frequently as current collection efficiency of the Pt ring, which was determined to be 42.4 [2,3].

Tafel plots were obtained by representing E vs. Log(I), following the equations:

$$E = a + b \log(I) \quad (S5)$$

where I is the current density and b is the Tafel slope.

Tafel slope values included in the Table I and II correspond to the average of three RRDE rotation speeds for two different LSV measures.

On the other hand, onset values for ORR and OER were calculated from the initial point where the Tafel slope is separated from the experimental curve.

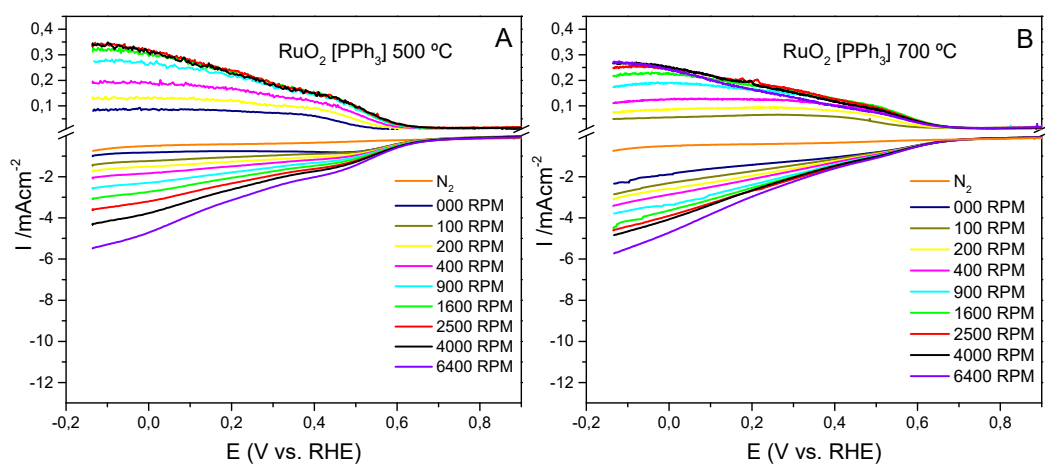

**Figure S5.** LSV curves of: A) RuO<sub>2</sub> [PPh<sub>3</sub>] calcined at 500 °C; b) RuO<sub>2</sub> [PPh<sub>3</sub>] calcined at 700 °C, obtained using a RRDE in O<sub>2</sub> and N<sub>2</sub> saturated 0.1 KOH. Rotation rates values are included in each graph.

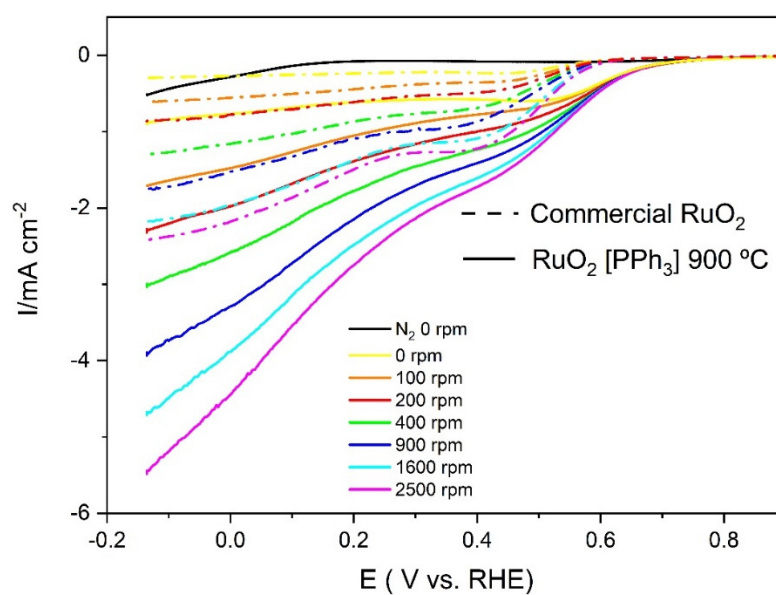

**Figure S6.** LSV curves for RuO<sub>2</sub> [PPh<sub>3</sub>] 900 °C and Commercial RuO<sub>2</sub> purchased from Merck.

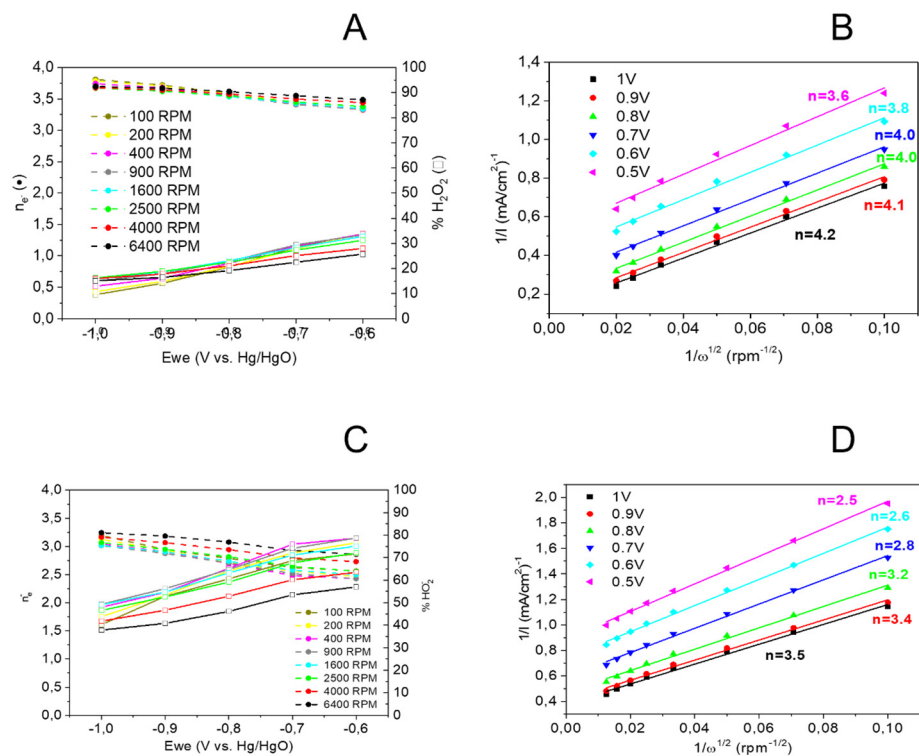

**Figure S7.** (A,C) Dependence of the electron transfer number and  $\text{HO}_2^-$  values with the electrode potential at different rotation rates from data in Figure 5, using Equation (S3) and (S4). (B,D) KL plots. (A,B) for  $\text{RuO}_2$  [RuCl<sub>3</sub>] and  $\text{RuO}_2$  [Cym] calcined at 900 °C.



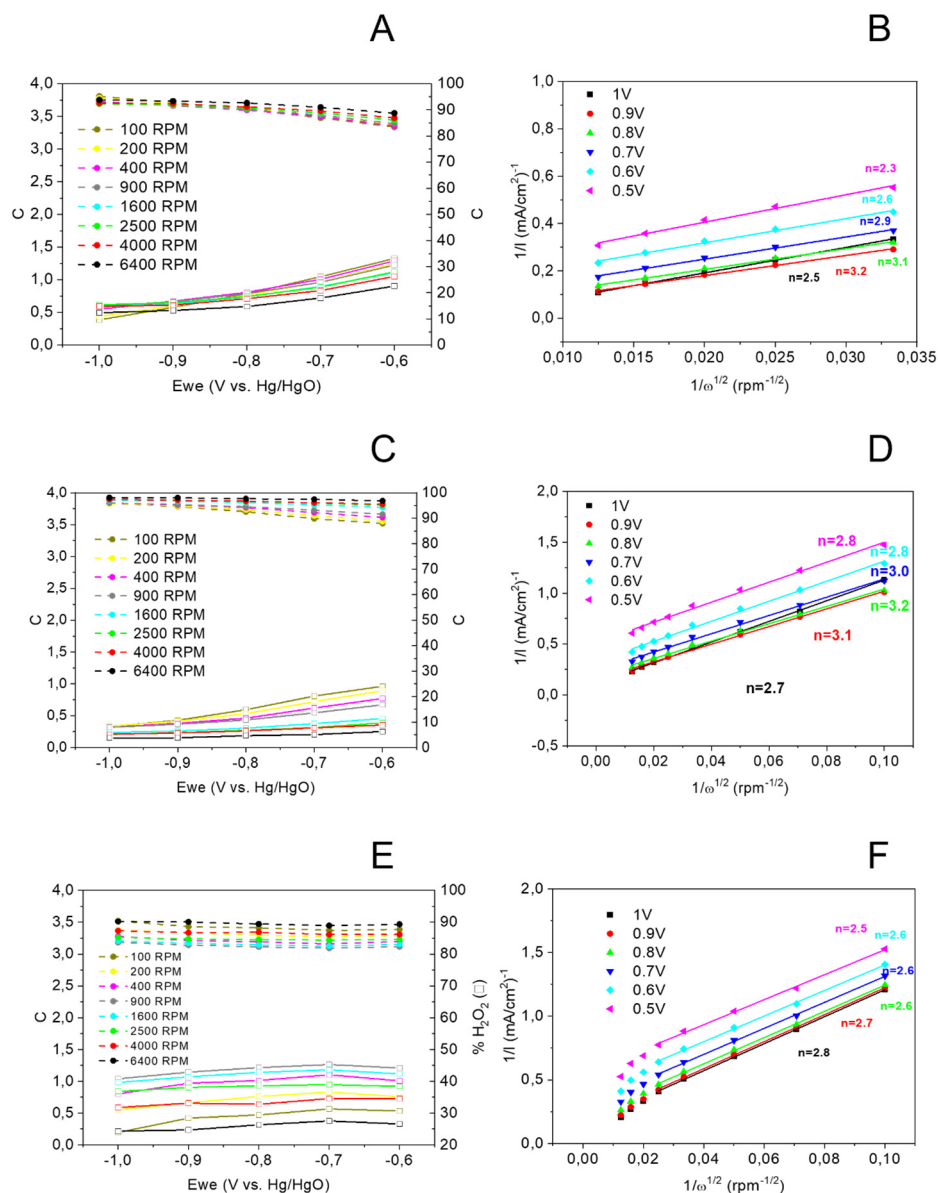

**Figure S8.** (A,C,E) Dependence of the electron transfer number and  $\text{HO}_2^-$  values with the electrode potential at different rotation rates from data in Figure 5, using Equations (S3) and (S4). (B,D,F) KL plots. (A,B) for RuO<sub>2</sub> [PPh<sub>3</sub>] at 900 °C; (C,D) RuO<sub>2</sub> [PPh<sub>3</sub>] at 700 °C and (E,F) RuO<sub>2</sub> [PPh<sub>3</sub>] at 500 °C.

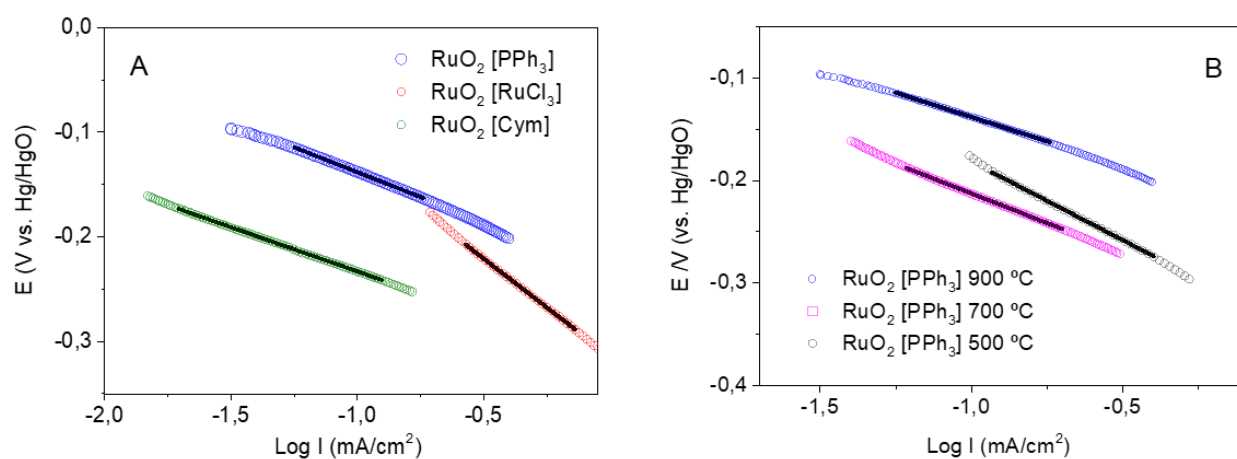

**Figure S9.** Tafel plots for ORR of the  $\text{RuO}_2$ -based catalysts. (A)  $\text{RuO}_2 [\text{PPh}_3]$ ,  $\text{RuO}_2 [\text{RuCl}_3]$  and  $\text{RuO}_2 [\text{Cym}]$  calcined at 900 °C and (B) the three  $\text{RuO}_2 [\text{PPh}_3]$  obtained at 500, 700 and 900 °C.

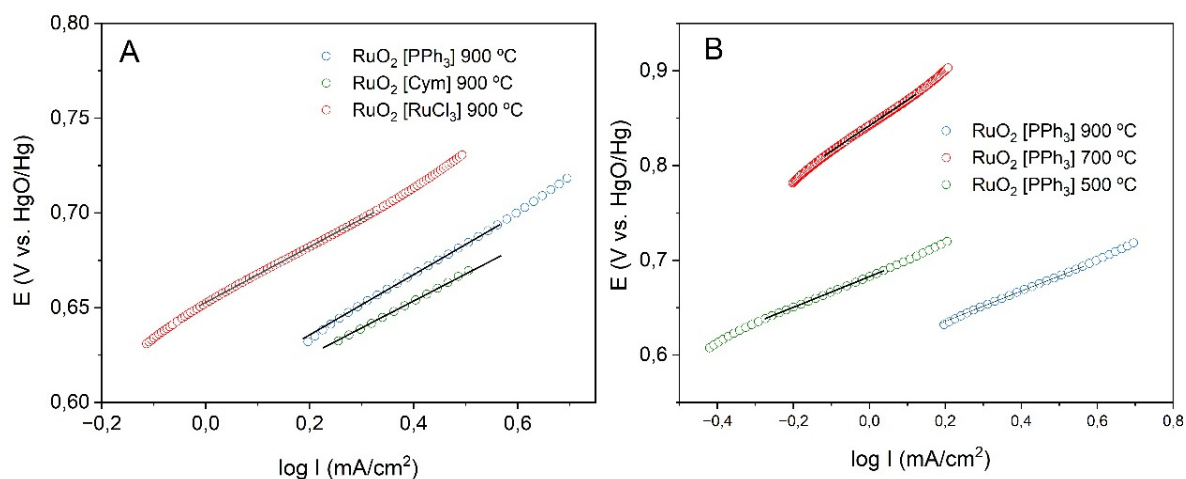

**Figure S10.** Tafel plots for OER of the  $\text{RuO}_2$ -based catalysts. (A)  $\text{RuO}_2 [\text{PPh}_3]$ ,  $\text{RuO}_2 [\text{RuCl}_3]$  and  $\text{RuO}_2 [\text{Cym}]$  calcined at 900 °C and (B) the three  $\text{RuO}_2 [\text{PPh}_3]$  obtained at 500, 700 and 900 °C.

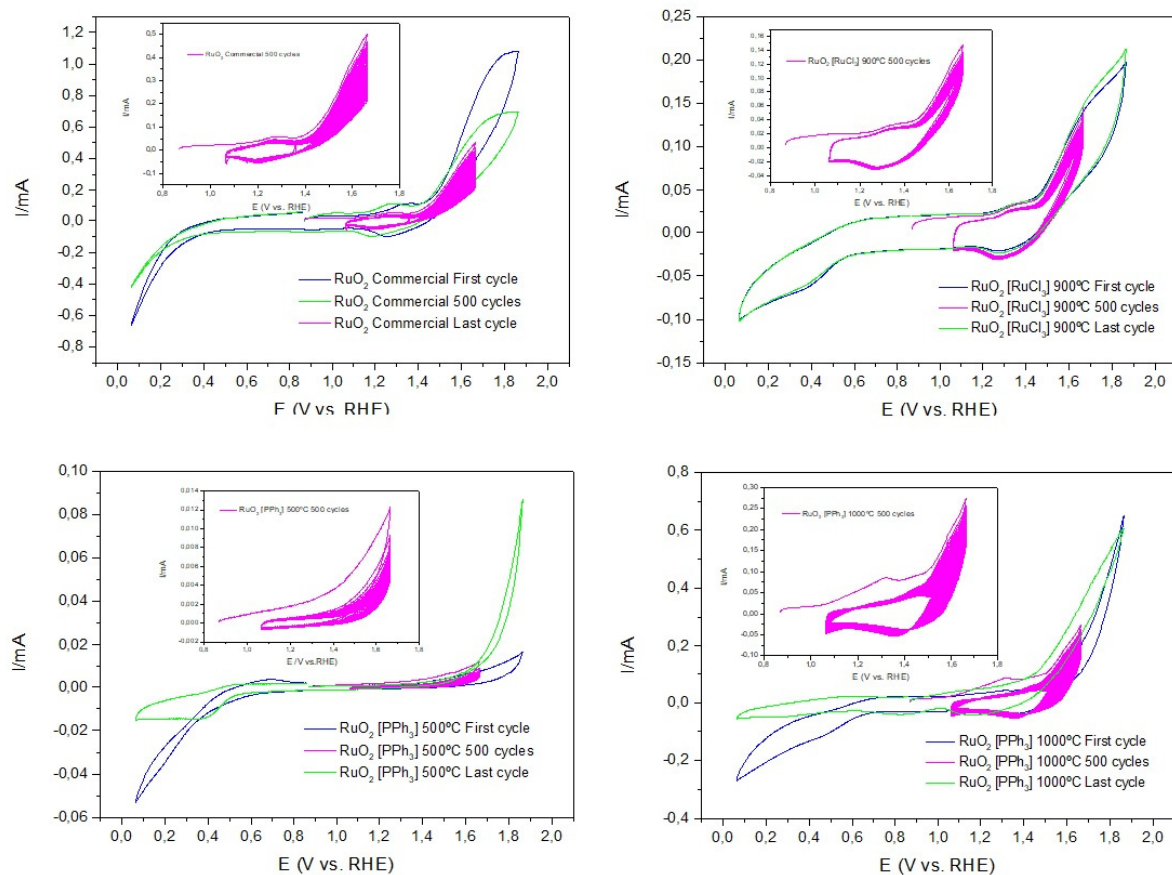

**Figure S11.** Stability CV plots obtained for (A) Commercial RuO<sub>2</sub>, (B) RuO<sub>2</sub> [RuCl<sub>3</sub>], (C) RuO<sub>2</sub> [PPh<sub>3</sub>] 500 °C and (D) RuO<sub>2</sub> [PPh<sub>3</sub>] 1000 °C.

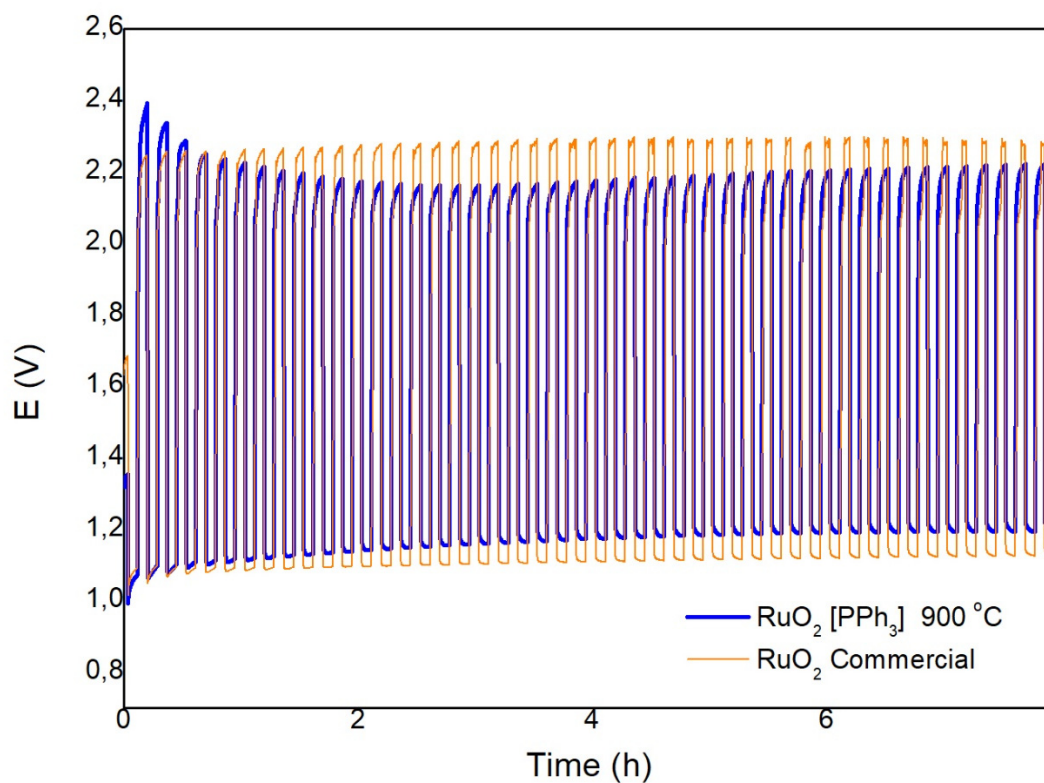

**Figure S12.** Discharge/Charge cycles of a flooded Zn/air battery in ~1mL 8M KOH solution, adding RuO<sub>2</sub> [PPh<sub>3</sub>] 900 °C and Commercial RuO<sub>2</sub>.

## References

1. Du, C.; Tan, Q.; Yin, G.; Zhang, J. Rotating Ring-Disk Electrode Method. In Rotating Electrode Methods and Oxygen Reduction Electrocatalysts; Elsevier: Amsterdam, The Netherlands, 2014; pp. 171–198. <https://doi.org/10.1016/B978-0-444-63278-4.00005-7>.
2. Dalton, F. Historical Origins of the Rotating Ring-Disk Electrode. *Electrochem. Soc. Interface* **2016**, 25, 50–59.
3. Garsany, Y.; Ge, J.; St-Pierre, J.; Rocheleau, R.; Swider-Lyons, K. ORR Measurements Reproducibility Using a RRDE. *ECS Trans.* **2013**, 58, 1233–1241. <https://doi.org/10.1149/05801.1233ecst>.
